# Supplementary material for: Meta-Analysis of the Response of the Productivity of Different Crops to Parameters and Processes in Soil Nitrogen Cycle under Biochar Addition
Source: MDPI journal article supplement (doi:10.3390/agronomy12081857), 2022-08-05
Supplement: s1 [file s1]

# **Supplementary Materials for Meta-analysis of the Response of the Productivity of Different Crops to Parameters and Processes in Soil Nitrogen Cycle under Biochar Addition**

Leiyi Zhang<sup>a, b</sup>, Zhuohao Wu<sup>a</sup>, Jingyan Zhou<sup>a</sup>, Lingli Zhou<sup>a</sup>, Yang Lu<sup>a</sup>, Yangzhou Xiang<sup>c</sup>,

Renduo Zhang<sup>b</sup>, Qi Deng<sup>d, \*</sup>, Wencheng Wu<sup>a, \*\*</sup>

*<sup>a</sup>South China Institute of Environmental Sciences, Ministry of Ecology and Environment,  
Guangzhou 510655, China*

*<sup>b</sup>Guangdong Provincial Key Laboratory of Environmental Pollution Control and Remediation  
Technology, School of Environmental Science and Engineering, Sun Yat-sen University,  
Guangzhou 510006, China*

*<sup>c</sup>School of Geography and Resources, Guizhou Education University, Guiyang 550003, China*

*<sup>d</sup>Key Laboratory of Vegetation Restoration and Management of Degraded Ecosystems, South  
China Botanical Garden, Chinese Academy of Sciences, Guangzhou 510650, China*

**\*Corresponding author:**

---

Wencheng Wu: Tel: +86 020 85574549; E-mail address: wuwencheng@scies.org

Qi Deng: Tel: +86 20 84110052; E-mail address: dengqi@scbg.ac.cn

## **S1. Data sources**

The published articles were searched on the Web of Science and Google Scholar (most recent search, October 15, 2020) by using the keywords (biochar OR black carbon) AND (nitrogen OR N OR nitrate OR ammonium OR mineral N OR inorganic N) AND (crop growth OR crop productivity OR crop yield OR crop biomass) AND (soil). The whole datasets were selected from 93 published articles in this study.

References for data compilation that related the effects of soil N cycle on different crops productivity under biochar addition in the fields, were used in this study. These information, including references regarding the relative indexes of different crops productivity (rice, maize, wheat, legumes, forage grass, cotton, tuber, vegetables , and sugarcane); soil N pools (i.e., total N (TN), microbial biomass N (MBN), inorganic N (IN) and  $\text{NH}_4^+\text{-N}$  and  $\text{NO}_3^-\text{-N}$ ); microbial indicators are used (i.e., soil total microbial abundance (SMA), amoA and denitrifying genes (DENG) ) to indicate N transformations, N fixations (biological  $\text{N}_2$  fixation, plant N uptake), and N losses (i.e.,  $\text{NH}_3$  volatilization,  $\text{N}_2\text{O}$  emission, and N leaching) were listed in the Excel file of Supplementary Material.

The fail-safe numbers and funnel plots were presented in the Table S1-S3 and Figure S1, respectively, to elucidate the publication bias. If the fail-safe number was  $> 5n+1$  (where  $n$  is the number of datasets) or the data of effect sizes falling in the funnel area, the result from the datasets should be no publication bias (Rosenthal and Rosnow, 1984; Rothstein et al., 2006).

## S2. Results

As shown in Table S1, values of the fail-safe number of crop productivity, the productivities of rice, maize, wheat, legumes, tuber, vegetables, and forage grass were much larger than the values of  $5n+1$ . The fail-safe number of cotton productivity was less than the values of  $5n+1$ . However, the data of effect size of cotton productivity was overall falling in the funnel area (Fig. S1). Therefore, the results from the datasets were without publication bias to the disparate crop productivity.

Moreover, the fail-safe number values of TN, MBN,  $\text{NH}_4^+\text{-N}$ ,  $\text{NO}_3^-\text{-N}$ , SMA, amoA, DENG,  $\text{N}_2\text{O}$  emission,  $\text{NH}_3$  volatilization, N leaching, biological  $\text{N}_2$  fixation, and plant N uptake were much larger than the values of  $5n+1$  (Table S2-S3), and thus these results from the datasets were without publication bias. However, the fail-safe number value of inorganic N was less than the values of  $5n+1$  (Table S2), and the data of effect sizes of inorganic N was not overall falling in the funnel area (Fig. S1). Thus, the result from the datasets could be publication bias.

**Table S1** Values of fail-safe number of crop productivity (CP), and the productivities of rice, maize, wheat, legumes, tuber, vegetables, forage grass, and cotton in the investigated datasets.

| Index                       | CP       | Rice     | Maize    | Wheat  | Legumes  | Tuber    | Vegetables | Forage grass | Cotton |
|-----------------------------|----------|----------|----------|--------|----------|----------|------------|--------------|--------|
| Sample size ( $n$ )         | 697      | 98       | 153      | 134    | 132      | 60       | 53         | 45           | 16     |
| $5n + 1$                    | 3486     | 491      | 766      | 671    | 661      | 301      | 266        | 225          | 81     |
| Fail-safe number            | 763500   | 5791     | 38120    | 22946  | 48064    | 14214    | 4261       | 578          | 66     |
| Observed significance level | < 0.0001 | < 0.0001 | < 0.0001 | 0.0032 | < 0.0001 | < 0.0001 | < 0.0001   | < 0.0001     | 0.0001 |
| Target significance level   | 0.05     | 0.05     | 0.05     | 0.05   | 0.05     | 0.05     | 0.05       | 0.05         | 0.05   |
| Does bias affect the trend  | No       | No       | No       | Yes    | No       | No       | No         | No           | Yes    |

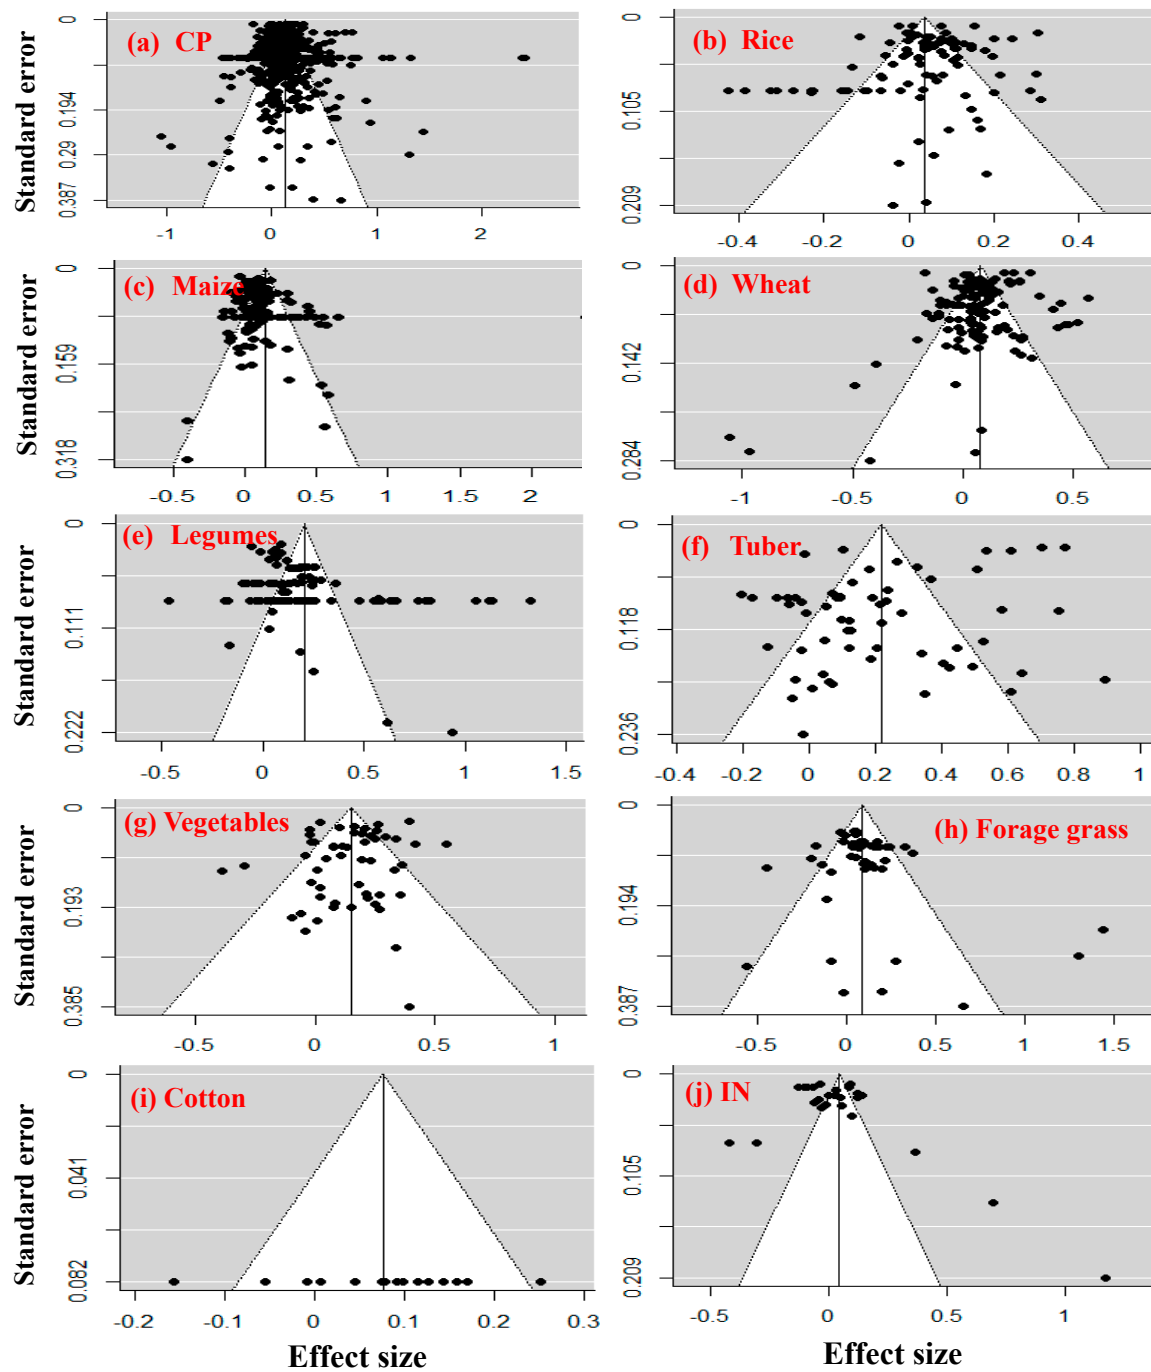

**Figure S1** Funnel plots of the effect sizes of abundance of (a) crop productivity, the productivities of (b) rice, (c) maize, (d) wheat, (e) legumes, (f) tuber, (g) vegetables, (h) forage grass, (i) cotton, and (j) inorganic N (IN) in the investigated datasets.

**Table S2** Fail-safe number values of soil total N (TN), microbial biomass N (MBN),  $\text{NH}_4^+$ -N,  $\text{NO}_3^-$ -N, inorganic N (IN), soil microbial abundance (SMA), and amoA including archaeal ammonia (AOA) and bacterial ammonia (AOB) oxidizers in the investigated datasets.

| Index                       | TN       | MBN      | $\text{NH}_4^+$ -N | $\text{NO}_3^-$ -N | IN       | SMA      | amoA     |
|-----------------------------|----------|----------|--------------------|--------------------|----------|----------|----------|
| Sample size ( $n$ )         | 221      | 33       | 109                | 122                | 27       | 29       | 50       |
| $5n + 1$                    | 1106     | 166      | 546                | 611                | 136      | 146      | 251      |
| Fail-safe number            | 256140   | 262      | 9166               | 1813               | 115      | 7927     | 3939     |
| Observed significance level | < 0.0001 | < 0.0001 | < 0.0001           | < 0.0001           | < 0.0001 | < 0.0001 | < 0.0001 |
| Target significance level   | 0.05     | 0.05     | 0.05               | 0.05               | 0.05     | 0.05     | 0.05     |
| Does bias affect the trend  | No       | No       | No                 | No                 | Yes      | No       | No       |

**Table S3** The values of fail-safe number of soil denitrification genes (DENG: including nitrite reductase genes (nirK and nirS), nitrate reductase gene (narG), and nitrous oxide reductase gene (nosZ)), N<sub>2</sub>O emission (N<sub>2</sub>OE), NH<sub>3</sub> volatilization (NH<sub>3</sub>V), soil N leaching (NL), biological N<sub>2</sub> fixation (BNF), and plant N uptake (PNU) in the investigated datasets.

| Index                       | DENG     | N <sub>2</sub> OE | NH <sub>3</sub> V | NL       | BNF      | PNU      |
|-----------------------------|----------|-------------------|-------------------|----------|----------|----------|
| Sample size ( <i>n</i> )    | 48       | 173               | 39                | 23       | 19       | 149      |
| $5n + 1$                    | 241      | 866               | 196               | 116      | 96       | 746      |
| Fail-safe number            | 4037     | 31118             | 1529              | 1089     | 436      | 71151    |
| Observed significance level | < 0.0001 | < 0.0001          | < 0.0001          | < 0.0001 | < 0.0001 | < 0.0001 |
| Target significance level   | 0.05     | 0.05              | 0.05              | 0.05     | 0.05     | 0.05     |
| Does bias affect the trend  | No       | No                | No                | No       | No       | No       |

### S3. References

- Agegnehu, G., Bass, A.M., Nelson, P.N., Muirhead, B., Wright, G., Bird, M.I., 2015. Biochar and biochar-compost as soil amendments: Effects on peanut yield, soil properties and greenhouse gas emissions in tropical North Queensland, Australia. *Agri. Ecosyst. Environ.* 213, 72-85.
- Agegnehu, G., Nelson, P.N., Bird, M.I., 2016. The effects of biochar, compost and their mixture and nitrogen fertilizer on yield and nitrogen use efficiency of barley grown on a Nitisol in the highlands of Ethiopia. *Sci. Total Environ.* 569-570, 869-879.
- Ali, K., Arif, M., Islam, B., Hayat, Z., Ali, A., Naveed, K., Shah, F., 2018. Formulation of biochar based fertilizer for improving maize productivity and soil fertility. *Pakistan J. Botany* 50, 135-141.
- Alotaibi, K., Schoenau, J., 2016. Application of two bioenergy byproducts with contrasting carbon availability to a prairie soil: three-year crop response and changes in soil biological and chemical properties. *Agronomy-Basel* 6, 13.
- Arif, M., Ilyas, M., Riaz, M., Ali, K., Shah, K., Ul Haq, I., Fahad, S., 2017. Biochar improves phosphorus use efficiency of organic-inorganic fertilizers, maize-wheat productivity and soil quality in a low fertility alkaline soil. *Field Crop Res.* 214, 25-37.
- Azeem, M., Hayat, R., Hussain, Q., Ahmed, M., Pan, G., Ibrahim Tahir, M., Imran, M., Irfan, M., Mehmood ul, H., 2019. Biochar improves soil quality and N<sub>2</sub>-fixation and reduces net ecosystem CO<sub>2</sub> exchange in a dryland legume-cereal cropping system. *Soil Till. Res.* 186, 172-182.



- Badu, E., Kaba, J.S., Abunyewa, A.A., Dawoe, E.K., Agbenyega, O., Barnes, R.V., 2019. Biochar and inorganic nitrogen fertilizer effects on maize (*Zea mays* L.) nitrogen use and yield in moist semi-deciduous forest zone of Ghana. *J. Plant Nut.* 42, 2407-2422.
- Bian, R., Zhang, A., Li, L., Pan, G., Zheng, J., Zhang, X., Zheng, J., Joseph, S., Chang, A., 2014. Effect of municipal biowaste biochar on greenhouse gas emissions and metal bioaccumulation in a slightly acidic clay rice paddy. *Bioresources* 9, 685-703.
- Biederman, L.A., Phelps, J., Ross, B., Polzin, M., Harpole, W.S., 2017. Biochar and manure alter few aspects of prairie development: A field test. *Agri. Ecosyst. Environ.* 236, 78-87.
- Bohara, H., Dodla, S., Wang, J.J., Darapuneni, M., Kongchum, M., Fromme, D.D., Harrell, D., 2018. Impacts of N-stabilizers and biochar on nitrogen losses, nitrogen phytoavailability, and cotton yield in poultry litter-fertilized soils. *Agronomy* 110, 2016-2024.
- Brantley, K., Savin, M., Brye, K., Longer, D., 2015. Pine woodchip biochar impact on soil nutrient concentrations and corn yield in a silt loam in the mid-southern U.S. *Agriculture* 5, 30-47.
- Chaudhry, U.K., Shahzad, S., Naqqash, M.N., Saboor, A., Yaqoob, S., 2016. Integration of biochar and chemical fertilizer to enhance quality of soil and wheat crop (*Triticum aestivum* L.). *J Biodiversity Environ. Sci.* 9, 2222-3045.
- Ch'ng, H.Y., Ahmed, O.H., Ab Majid, N.M., Jalloh, M.B., 2017. Reducing soil phosphorus fixation to improve yield of maize on a tropical acid soil using compost and biochar derived from agro-industrial wastes. *Compost Sci. Util.* 205, 82-94.
- Chen, Y., Shinogi, Y., Taira, M., 2010. Influence of biochar use on sugarcane growth, soil

- parameters, and groundwater quality. *Aust. J. Soil Res.* 48, 526-530.
- Deng, Q., Hui, D., Wang, J., Iwuzo, S., Yu, C.L., Jima, T., Smart, D., Reddy, C., Dennis, S., 2015. Corn yield and soil nitrous oxide emission under different fertilizer and soil management: A three-year field experiment in middle Tennessee. *Plos One* 10, e0125406.
- Dong, D., Feng, Q., McGrouther, K., Yang, M., Wang, H., Wu, W., 2015. Effects of biochar amendment on rice growth and nitrogen retention in a waterlogged paddy field. *J. Soil Sediment.* 15, 153-162.
- Faria, W.M., Figueiredo, C.C.d., Coser, T.R., Vale, A.T., Schneider, B.G., 2017. Is sewage sludge biochar capable of replacing inorganic fertilizers for corn production? Evidence from a two-year field experiment. *Arch. Agron. Soil Sci.* 64, 505-519.
- Farrell, M., Macdonald, L.M., Butler, G., Chirino-Valle, I., Condon, L.M., 2014. Biochar and fertiliser applications influence phosphorus fractionation and wheat yield. *Biol. Fert. Soils* 50, 169-178.
- Foster, E.J., Hansen, N., Wallenstein, M., Cotrufo, M.F., 2016. Biochar and manure amendments impact soil nutrients and microbial enzymatic activities in a semi-arid irrigated maize cropping system. *Agri. Ecosyst. Environ.* 233, 404-414.
- Fungo, B., Lehmann, J., Kalbitz, K., Tenywa, M., Thiongo, M., Neufeldt, H., 2017. Emissions intensity and carbon stocks of a tropical Ultisol after amendment with Tithonia green manure, urea and biochar. *Field Crops Res.* 209, 179-188.
- Gao, S., Wang, D., Dangi, S.R., Duan, Y., Pflaum, T., Gartung, J., Qin, R., Turini, T., 2020. Nitrogen dynamics affected by biochar and irrigation level in an onion field. *Sci. Total*

Environ. 714.

Güereña, D., Lehmann, J., Hanley, K., Enders, A., Hyland, C., Riha, S., 2013. Nitrogen dynamics following field application of biochar in a temperate North American maize-based production system. *Plant Soil* 365, 239-254.

Haider, G., Steffens, D., Moser, G., Muller, C., Kammann, C.I., 2017. Biochar reduced nitrate leaching and improved soil moisture content without yield improvements in a four-year field study. *Agri. Ecosyst. Environ.* 237, 80-94.

He, T., Liu, D., Yuan, J., Luo, J., Lindsey, S., Bolan, N., Ding, W., 2018. Effects of application of inhibitors and biochar to fertilizer on gaseous nitrogen emissions from an intensively managed wheat field. *Sci. Total Environ.* 628-629, 121-130.

Huang, M., Fan, L., Chen, J., Jiang, L., Zou, Y., 2018. Continuous applications of biochar to rice: Effects on nitrogen uptake and utilization. *Sci. Rep.* 8, 11461.

Hui, D., Yu, C., Deng, Q., Saini, P., Collins, K., Koff, J., 2018. Weak effects of biochar and nitrogen fertilization on switchgrass photosynthesis, biomass, and soil respiration. *Agriculture-Basel* 8.

Jalal, F., Arif, M., Akhtar, K., Khan, A., Naz, M., Said, F., Zaheer, S., Hussain, S., Imtiaz, M., Khan, M.A., Ali, M., Wei, F., 2020. Biochar integration with legume crops in summer gape synergizes nitrogen use efficiency and enhance maize yield. *Agronomy-Basel* 10.

Jones, D.L., Rousk, J., Edwards-Jones, G., DeLuca, T.H., Murphy, D.V., 2012. Biochar-mediated changes in soil quality and plant growth in a three year field trial. *Soil Biol. Biochem.* 45, 113-124.

- Keith, A., Singh, B., Dijkstra, F.A., van Ogtrop, F., 2016. Biochar field study: greenhouse gas emissions, productivity, and nutrients in two soils. *Agronomy J.* 108, 1805-1815.
- Kimetu, J.M., Lehmann, J., Ngoze, S.O., Mugendi, D.N., Kinyangi, J.M., Riha, S., Verchot, L., Recha, J.W., Pell, A.N., 2008. Reversibility of soil productivity decline with organic matter of differing quality along a degradation gradient. *Ecosystems* 11, 726-739.
- Koga, N., Shimoda, S., Iwata, Y., 2017. Biochar impacts on crop productivity and greenhouse gas emissions from an Andosol. *J. Environ Qual.* 46, 27-35.
- Lan, Z., Chen, C., Rezaei Rashti, M., Yang, H., Zhang, D., 2019. Linking feedstock and application rate of biochars to N<sub>2</sub>O emission in a sandy loam soil: potential mechanisms. *Geoderma* 337, 880-892.
- Lentz, R.D., Ippolito, J.A., Spokas, K.A., 2014. Biochar and manure effects on net nitrogen mineralization and greenhouse gas emissions from Calcareous soil under corn. *Soil Sci. Soc. Am. J.* 78, 1641-1655.
- Li, B., Bi, Z., Xiong, Z., 2017. Dynamic responses of nitrous oxide emission and nitrogen use efficiency to nitrogen and biochar amendment in an intensified vegetable field in Southeastern China. *GCB Bioenergy* 9, 400-413.
- Li, B., Fan, C., Xiong, Z., Li, Q., Zhang, M., 2015a. The combined effects of nitrification inhibitor and biochar incorporation on yield-scaled N<sub>2</sub>O emissions from an intensively managed vegetable field in Southeastern China. *Biogeosciences* 12, 2003-2017.
- Li, B., Fan, C., Zhang, H., Chen, Z., Sun, L., Xiong, Z., 2015b. Combined effects of nitrogen fertilization and biochar on the net global warming potential, greenhouse gas intensity and

- net ecosystem economic budget in intensive vegetable agriculture in Southeastern China. Atmos. Environ. 100, 10-19.
- Li, B., Huang, W., Elsgaard, L., Yang, B., Li, Z., Yang, H., Lu, Y., 2020. Optimal biochar amendment rate reduced the yield-scaled N<sub>2</sub>O emissions from Ultisols in an intensive vegetable field in South China. Sci. Total Environ. 723.
- Li, S., Wang, S., Shangguan, Z., 2019. Combined biochar and nitrogen fertilization at appropriate rates could balance the leaching and availability of soil inorganic nitrogen. Agri. Ecosyst. Environ. 276, 21-30.
- Li, Q., Liao, N., Zhang, N., Zhou, G., Zhang, W., Wei, X., Ye, J., Hou, Z., 2016. Effects of cotton (*Gossypium hirsutum* L.) straw and its biochar application on NH<sub>3</sub> volatilization and N use efficiency in a drip-irrigated cotton field. Soil Sci. Plant Nutr. 62, 534-544.
- Liang, F., Li, G., Lin, Q., Zhao, X., 2014. Crop yield and soil properties in the first 3 years after biochar application to a calcareous soil. J. Integr. Agri. 13, 525-532.
- Liu, Q., Liu, B., Ambus, P., Zhang, Y., Hansen, V., Lin, Z., Shen, D., Liu, G., Bei, Q., Zhu, J., Wang, X., Ma, J., Lin, X., Yu, Y., Zhu, C., Xie, Z., 2016. Carbon footprint of rice production under biochar amendment - A case study in a Chinese rice cropping system. GCB Bioenergy 8, 148-159.
- Liu, Q., Liu, B., Zhang, Y., Lin, Z., Zhu, T., Sun, R., Wang, X., Ma, J., Bei, Q., Liu, G., Lin, X., Xie, Z., 2017. Can biochar alleviate soil compaction stress on wheat growth and mitigate soil N<sub>2</sub>O emissions? Soil Biol. Biochem. 104, 8-17.
- Liu, X., Qu, J., Li, L., Zhang, A., Zheng, J., Zheng, J., Pan, G., 2012. Can biochar amendment

- be an ecological engineering technology to depress N<sub>2</sub>O emission in rice paddies? - A cross site field experiment from South China. *Ecol. Eng.* 42, 168-173.
- Liu, X., Ye, Y., Liu, Y., Zhang, A., Zhang, X., Li, L., Pan, G., Kibue, G.W., Zheng, J., Zheng, J., 2014. Sustainable biochar effects for low carbon crop production: A 5-crop season field experiment on a low fertility soil from Central China. *Agri. Syst.* 129, 22-29.
- Liu, X., Zhang, D., Li, H., Qi, X., Gao, Y., Zhang, Y., Han, Y., Jiang, Y., Li, H., 2020. Soil nematode community and crop productivity in response to 5-year biochar and manure addition to yellow cinnamon soil. *Bmc Ecol* 20.
- Liu, Z., Chen, X., Jing, Y., Li, Q., Zhang, J., Huang, Q., 2014. Effects of biochar amendment on rapeseed and sweet potato yields and water stable aggregate in upland red soil. *Catena* 123, 45-51.
- Marks, E.A.N., Mattana, S., Alcañiz, J.M., Pérez-Herrero, E., Domene, X., 2016. Gasifier biochar effects on nutrient availability, organic matter mineralization, and soil fauna activity in a multi-year Mediterranean trial. *Agri. Ecosyst. Environ.* 215, 30-39.
- Martos, S., Mattana, S., Ribas, A., Albanell, E., Domene, X., 2020. Biochar application as a win-win strategy to mitigate soil nitrate pollution without compromising crop yields: a case study in a Mediterranean calcareous soil. *J. Soil Sediment.* 20, 220-233.
- Mia, S., Dijkstra, F.A., Singh, B., 2018. Enhanced biological nitrogen fixation and competitive advantage of legumes in mixed pastures diminish with biochar aging. *Plant Soil* 424, 639-651.
- Mia, S., Singh, B., Dijkstra, F.A., 2017. Aged biochar affects gross nitrogen mineralization and

recovery: a  $^{15}\text{N}$  study in two contrasting soils. *GCB Bioenergy* 9, 1196-1206.

Munera-Echeverri, J.L., Martinsen, V., Strand, L.T., Cornelissen, G., Mulder, J., 2020. Effect of conservation farming and biochar addition on soil organic carbon quality, nitrogen mineralization, and crop productivity in a light textured Acrisol in the sub-humid tropics. *Plos One* 15.

Niu, Y., Chen, Z., Müller, C., Zaman, M.M., Kim, D., Yu, H., Ding, W., 2017. Yield-scaled  $\text{N}_2\text{O}$  emissions were effectively reduced by biochar amendment of sandy loam soil under maize-wheat rotation in the North China Plain. *Atmos. Environ.* 170, 58-70.

Niu, Y., Luo, J., Liu, D., Müller, C., Zaman, M., Lindsey, S., Ding, W., 2018. Effect of biochar and nitrapyrin on nitrous oxide and nitric oxide emissions from a sandy loam soil cropped to maize. *Biol. Fert. Soils* 54, 645-658.

Oladele, S.O., Adeyemo, A.J., Awodun, M.A., 2019. Influence of rice husk biochar and inorganic fertilizer on soil nutrients availability and rain-fed rice yield in two contrasting soils. *Geoderma* 336, 1-11.

Palviainen, M., Berninger, F., Bruckman, V.J., Köster, K., de Assumpção, C.R.M., Aaltonen, H., Makita, N., Mishra, A., Kulmala, L., Adamczyk, B., 2018. Effects of biochar on carbon and nitrogen fluxes in boreal forest soil. *Plant Soil* 425, 71-85.

Pandian, K., Subramaniayan, P., Gnasekaran, P., Chitraputhirapillai, S., 2016. Effect of biochar amendment on soil physical, chemical and biological properties and groundnut yield in rainfed Alfisol of semi-arid tropics. *Arch. Agr. Soil Sci.* 62, 1293-1310.

Rafiq, M.K., Bai, Y., Aziz, R., Rafiq, M.T., Masek, O., Bachmann, R.T., Joseph, S., Shahbaz,

- M., Qayyum, A., Shang, Z., Danaee, M., Long, R., 2020. Biochar amendment improves alpine meadows growth and soil health in Tibetan plateau over a three years period. *Sci. Total Environ.* 717.
- Rizhiya, E.Y., Mukhina, I.M., Balashov, E.V., Simansky, V., Buchkina, N.P., 2019. Effect of biochar on N<sub>2</sub>O emission, crop yield and properties of Stagnic Luvisol in a field experiment. *Zemdirbyste* 106, 297-306.
- Rosenthal, R., Rosnow, R.L., 1984. *Essentials of behavioral research: methods and dataanalysis.* McGraw-Hill Higher Education.
- Rothstein, H.R., Sutton, A.J., Borenstein, M., 2006. *Publication bias in meta-analysis.* John Wiley & Sons, Ltd., pp. 1-7.
- Saarnio, S., Rätty, M., Hyrkäs, M. and Virkajärvi, P., 2018. Biochar addition changed the nutrient content and runoff water quality from the top layer of a grass field during simulated snowmelt. *Agri. Ecosyst Environ.* 265, 156-165.
- Schimmelpfennig, S., Müller, C., Grünhage, L., Koch, C., Kammann, C., 2014. Biochar, hydrochar and uncarbonized feedstock application to permanent grassland effects on greenhouse gas emissions and plant growth. *Agri. Ecosyst. Environ.* 191, 39-52.
- Si, L., Xie, Y., Ma, Q., Wu, L., 2018. The short-term effects of rice straw biochar, nitrogen and phosphorus fertilizer on rice yield and soil properties in a cold waterlogged paddy field. *Sustainability* 10, 537.
- Sun, Z., Sanger, A., Rebersburg, P., Lentzsch, P., Wirth, S., Kaupenjohann, M., Meyer-Aurich, A., 2017. Contrasting effects of biochar on N<sub>2</sub>O emission and N uptake at different N



- fertilizer levels on a temperate sandy loam. *Sci. Total Environ.* 578, 557-565.
- Sun, H., Dan, A., Feng, Y., Vithanage, M., Mandal, S., Shaheen, S.M., Rinklebe, J., Shi, W., Wang, H., 2019a. Floating duckweed mitigated ammonia volatilization and increased grain yield and nitrogen use efficiency of rice in biochar amended paddy soils. *Chemosphere* 237, 124532.
- Sun, X., Zhong, T., Zhang, L., Zhang, K., Wu, W., 2019b. Reducing ammonia volatilization from paddy field with rice straw derived biochar. *Sci. Total Environ.* 660, 512-518.
- Sun, Y., Yang, J., Yao, R., Chen, X., 2019c. Biochar and fulvic acid to activate soil fertility for achieving agri-ecology benefits in a newly reclaimed coastal wetland of China. *Emir. J. Food Agri.* 31, 459-469.
- Tan, G., Wang, H., Xu, N., Liu, H., Zhai, L., 2018. Biochar amendment with fertilizers increases peanut N uptake, alleviates soil N<sub>2</sub>O emissions without affecting NH<sub>3</sub> volatilization in field experiments. *Environ. Sci. Poll. Res.* 25, 8817-8826.
- Tian, X., Li, C., Zhang, M., Wan, Y., Xie, Z., Chen, B., Li, W., 2018. Biochar derived from corn straw affected availability and distribution of soil nutrients and cotton yield. *Plos One* 13, e0189924.
- Van de Voorde, T.F., Bezemer, T.M., Van Groenigen, J.W., Jeffery, S., Mommer, L., 2014. Soil biochar amendment in a nature restoration area: effects on plant productivity and community composition. *Ecol. Appl.* 24, 1167-1177.
- Van Zwieten, L., Rose, T., Herridge, D., Kimber, S., Rust, J., Cowie, A., Morris, S., 2015. Enhanced biological N<sub>2</sub> fixation and yield of faba bean (*Vicia faba* L.) in an acid soil

- following biochar addition: dissection of causal mechanisms. *Plant Soil* 395, 7-20.
- Walter, R., Rao, B.K.R., 2015. Biochars influence sweet-potato yield and nutrient uptake in tropical Papua New Guinea. *J. Plant Nutr. Soil Sci.* 178, 393-400.
- Wang, C., Liu, J., Shen, J., Chen, D., Li, Y., Jiang, B., Wu, J., 2018. Effects of biochar amendment on net greenhouse gas emissions and soil fertility in a double rice cropping system: A 4-year field experiment. *Agri. Ecosyst. Environ.* 262, 83-96.
- Wang, C., Wang, W., Sardans, J., Singla, A., Zeng, C., Lai, D.Y.F., Penuelas, J., 2019a. Effects of steel slag and biochar amendments on CO<sub>2</sub>, CH<sub>4</sub>, and N<sub>2</sub>O flux, and rice productivity in a subtropical Chinese paddy field. *Environ. Geochem. Hlth.* 41, 1419-1431.
- Wang, S., Shan, J., Xia, Y., Tang, Q., Xia, L., Lin, J., Yan, X., 2017. Different effects of biochar and a nitrification inhibitor application on paddy soil denitrification: A field experiment over two consecutive rice-growing seasons. *Sci. Total Environ.* 593, 347-356.
- Wang, Y., Liu, Y., Liu, R., Zhang, A., Yang, S., Liu, H., Zhou, Y., Yang, Z., 2017. Biochar amendment reduces paddy soil nitrogen leaching but increases net global warming potential in Ningxia irrigation, China. *Sci. Rep.* 7, 1592.
- Wang, Z., Li, Y., Guo, W., Xu, Z., Wang, L., Ma, L., 2019b. Yield, nitrogen use efficiency and economic benefits of biochar additions to Chinese Flowering Cabbage in Northwest China. *Nutr. Cycl. Agroecosyst.* 113, 337-348.
- Wu, Y., Li, F., Zheng, H., Hong, M., Hu, Y., Zhao, B., De, H., 2019. Effects of three types of soil amendments on yield and soil nitrogen balance of maize-wheat rotation system in the Hetao Irrigation Area, China. *J. Arid. Land* 11, 904-915.

- Xiang, J., Liu, D., Ding, W., Yuan, J., Lin, Y., 2015. Effects of biochar on nitrous oxide and nitric oxide emissions from paddy field during the wheat growth season. *J. Clean Prod.* 104, 52-58.
- Xiao, Q., Zhu, L., Tang, L., Shen, Y., Li, S., 2017. Responses of crop nitrogen partitioning, translocation and soil nitrogen residue to biochar addition in a temperate dryland agricultural soil. *Plant Soil* 418, 405-421.
- Xiao, Y., Yang, S., Xu, J., Ding, J., Sun, X., Jiang, Z., 2018. Effect of biochar amendment on methane emissions from paddy field under water-saving irrigation. *Sustainability* 10, 1371.
- Xu, C., Bai, S.H., Hao, Y., Rachaputi, R.C.N., Xu, Z., Wallace, H.M., 2015. Peanut shell biochar improves soil properties and peanut kernel quality on a red ferrosol. *J. Soil Sediment.* 15, 2220-2231.
- Yang, S., Xiao, Y., Sun, X., Ding, J., Jiang, Z., Xu, J., 2019. Biochar improved rice yield and mitigated CH<sub>4</sub> and N<sub>2</sub>O emissions from paddy field under controlled irrigation in the Taihu Lake Region of China. *Atmos. Environ.* 200, 69-77.
- Yang, X., Lan, Y., Meng, J., Chen, W., Huang, Y., Cheng, X., He, T., Cao, T., Liu, Z., Jiang, L., 2017. Effects of maize stover and its derived biochar on greenhouse gases emissions and C-budget of brown earth in Northeast China. *Environ. Sci. Poll. Res.* 24, 8200-8209.
- Yu, L., Lu, X., He, Y., Brookes, P.C., Liao, H., Xu, J., 2017. Combined biochar and nitrogen fertilizer reduces soil acidity and promotes nutrient use efficiency by soybean crop. *J. Soil Sediment.* 17, 599-610.
- Zhang, A., Bian, R., Pan, G., Cui, L., Hussain, Q., Li, L., Zheng, J., Zheng, J., Zhang, X., Han,

- X., Yu, X., 2012a. Effects of biochar amendment on soil quality, crop yield and greenhouse gas emission in a Chinese rice paddy: A field study of 2 consecutive rice growing cycles. *Field Crops Res.* 127, 153-160.
- Zhang, A., Cui, L., Pan, G., Li, L., Hussain, Q., Zhang, X., Zheng, J., Crowley, D., 2010. Effect of biochar amendment on yield and methane and nitrous oxide emissions from a rice paddy from Tai Lake plain, China. *Agri. Ecosyst. Environ.* 139, 469-475.
- Zhang, A., Liu, Y., Pan, G., Hussain, Q., Li, L., Zheng, J., Zhang, X., 2012b. Effect of biochar amendment on maize yield and greenhouse gas emissions from a soil organic carbon poor calcareous loamy soil from Central China Plain. *Plant Soil* 351, 263-275.
- Zhang, A., Cheng, G., Hussain, Q., Zhang, M., Feng, H., Dyck, M., Sun, B., Zhao, Y., Chen, H., Chen, J., Wang, X., 2017. Contrasting effects of straw and straw-derived biochar application on net global warming potential in the Loess Plateau of China. *Field Crops Res.* 205, 45-54.
- Zhang, D., Pan, G., Wu, G., Kibue, G.W., Li, L., Zhang, X., Zheng, J., Zheng, J., Cheng, K., Joseph, S., Liu, X., 2016. Biochar helps enhance maize productivity and reduce greenhouse gas emissions under balanced fertilization in a rainfed low fertility inceptisol. *Chemosphere* 142, 106-113.
- Zhang, Q., Song, Y., Wu, Z., Yan, X., Gunina, A., Kuzyakov, Y., Xiong, Z., 2020. Effects of six-year biochar amendment on soil aggregation, crop growth, and nitrogen and phosphorus use efficiencies in a rice-wheat rotation. *J. Clean Prod.* 242.
- Zhang, Y., Lin, F., Wang, X., Zou, J., Liu, S., 2016. Annual accounting of net greenhouse gas

balance response to biochar addition in a coastal saline bioenergy cropping system in China. *Soil Till. Res.* 158, 39-48.

Zheng, J., Han, J., Liu, Z., Xia, W., Zhang, X., Li, L., Liu, X., Bian, R., Cheng, K., Zheng, J., Pan, G., 2017. Biochar compound fertilizer increases nitrogen productivity and economic benefits but decreases carbon emission of maize production. *Agri. Ecosyst. Environ.* 241, 70-78.

Zhou, Y., Berruti, F., Greenhalf, C., Tian, X., Henry, H.A.L., 2017. Increased retention of soil nitrogen over winter by biochar application: Implications of biochar pyrolysis temperature for plant nitrogen availability. *Agri. Ecosyst. Environ.* 236, 61-68.

Zhu, L., Xiao, Q., Shen, Y., Li, S., 2017. Microbial functional diversity responses to 2 years since biochar application in silt-loam soils on the Loess Plateau. *Ecotox. Environ. Safe.* 144, 578-584.
